# Supplementary material for: Exploring Deep Learning for Air Pollutant Emission Estimation
Source: Copernicus journal article supplement (doi:10.5194/gmd-2021-80), 2021-03-29
Supplement: Supplementary file [file gmd-2021-80-AC1-supplement.pdf]

1 We appreciate the reviewer’s valuable comments and constructive suggestions which  
2 help us improve the quality of the manuscript. We have carefully revised the manuscript  
3 according to these comments. Point-to-point responses are provided in the attachment.  
4 The reviewers’ comments are in black, our responses are in blue, and the quotes from  
5 our manuscript are in italics.

6  
7 **Reviewer #1**

8  
9 [Comment]: How does the authors ensure the robustness of the model?

10 [Response]: We thank the reviewer for the valuable comment. We ensure the robustness  
11 of the model from three aspects:

12 a) Model structure. Inspired by computer vision tasks, we adopt the batch-  
13 normalization (Ioffe and Szegedy, 2015), dropout (Srivastava et al., 2014), L2  
14 regularization (Zhang et al., 2016) to improve the generalization and robustness.

15 b) Early stop. When we train the NN-CTM, we split the data into train dataset and  
16 validation dataset. As introduced in Sec. 3.1, we trained NN-CTM on the data of the  
17 first 22 days in January, April, July, and October 2015 and tested it on the remaining  
18 successive 8 days of each month. We stop the model training when the evaluation in  
19 validation dataset does not improve within 1000 iterations.

20 c) Data augmentation. During training, we employ the noise injection, random  
21 rescaling, random rotation method to avoid the overfitting in training dataset.

22 We have clarified the model robustness in the revised manuscript, as follows:

23 (Section 2.2, Paragraph 5) “*Model robustness. We ensure the robustness of the model*  
24 *from three aspects: 1) Model structure. Inspired by computer vision tasks, we adopt the*  
25 *batch-normalization (Ioffe and Szegedy, 2015), dropout (Srivastava et al., 2014), L2*  
26 *regularization (Zhang et al., 2016) to improve the generalization and robustness. 2)*  
27 *Early stop. When we train the NN-CTM, we split the data into train dataset and*  
28 *validation dataset, and we stop the model training when the evaluation in validation*  
29 *dataset does not improve within 1000 iterations. 3) Data augmentation. During*  
30 *training, we employ the noise injection, random rescaling, random rotation method to*  
31 *avoid the overfitting in training dataset.*”

32  
33 Reference:

34 Ioffe S, Szegedy C. Batch Normalization: Accelerating Deep Network Training by

35 Reducing Internal Covariate Shift. JMLR.org 2015.  
36 Srivastava N, Hinton G, Krizhevsky A, Sutskever I, Salakhutdinov R. Dropout: A  
37 Simple Way to Prevent Neural Networks from Overfitting. Journal of Machine  
38 Learning Research 2014; 15: 1929-1958.  
39 Zhang C, Be Ngio S, Hardt M, Recht B, Vinyals O. Understanding deep learning  
40 requires rethinking generalization, 2016.

41

42 [Comment]: The authors use the observation data to update the emissions, however they  
43 do not mention what happens in case more than one observation station is in the grid.  
44 27 km × 27 km is a large grid size and hence would include many observation stations  
45 in one grid. The averaged observed concentration of all stations if used won't serve the  
46 purpose to accurately update the emissions at a station.

47 [Response]: We thank the reviewer for the valuable comment. As mentioned in Section  
48 2.3, we use the average value in case of multiple observation stations in a 27 km × 27  
49 km grid. We use the same processing method for observations when calculating MAE.  
50 We focus on the emission estimation in one grid, which will be limited by the grid size.  
51 If we want to get the higher resolution emission inventory estimation result (such as  
52 focus on one typical region instead of whole China domain), we should use a finer-  
53 grained emission inventory as the input. What's more, the lack of observation data in  
54 some regions limits our updating, so we are more concerned about making good use of  
55 existing observation data.

56

57 [Comment]: The entire premise of the model depends on availability of observation  
58 data, what happens if data is very sparsely available e.g. say out of 4 neighboring grids  
59 only one has observation data how are the emissions in other 3 grids updated?

60 [Response]: We thank the reviewer for the valuable comment. When we train the NN-  
61 CTM, the long short term memory (LSTM) block is employed to capture the temporal  
62 information, and the convolution (U-Net) is employed to capture the spatial information  
63 (e.g. the emission inventory, meteorological information, and geographic information  
64 of its neighbor grid). That is to say, in NN-CTM, the convolution neural network will  
65 capture the surrounding grids' information within the receptive field, and we make a  
66 detailed introduction about the receptive field in the answer of next comment which  
67 represents the transmission between different grids. Therefore, as shown in Fig. 1, if  
68 only the red grid has observation data, the surrounding blue grids' emission inventory

69 within the receptive field will also be updated. At the same time, the grids with a longer  
 70 distance will have a lower update weight. In extreme circumstances, if we have no  
 71 observation data, our method will not work as we have no more information to adjust  
 72 the emission inventory. If the observation data is denser, the emission inventory  
 73 estimation is more accurate as it can consider more observation data.  
 74

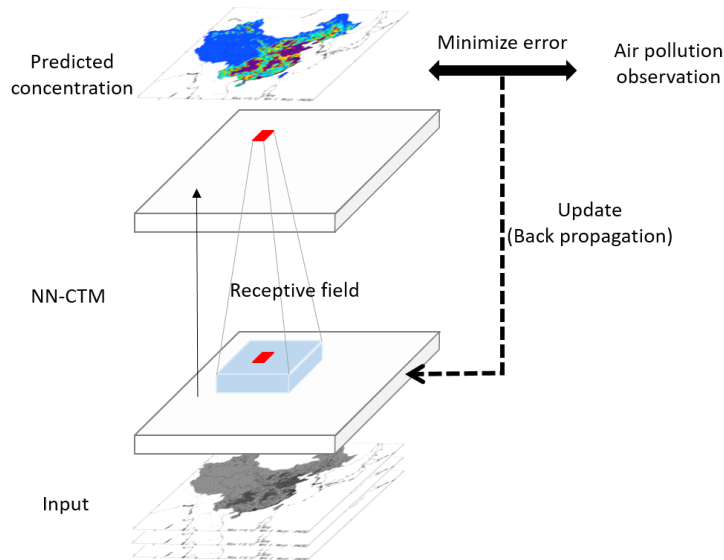

75  
 76 Figure 1: The visualization of neighbor emission update.

77  
 78 We have clarified the relation between observation data and emission inventory in the  
 79 revised manuscript, as follows:

80 (Section 2.3, Paragraph 1) *“The observation data will help update the surrounding*  
 81 *grids’ emission inventory within the receptive field. However, in extreme circumstances,*  
 82 *if we have no observation data, our method will not work as we have no more*  
 83 *information to adjust the emission inventory. If the observation data is denser, the*  
 84 *emission inventory estimation is more accurate as it can consider more observation*  
 85 *data.”*

86  
 87 [Comment]: Does the deep learning process consider the impact of transmission  
 88 between different grids? The authors are suggested to explain this point in detail.

89 [Response]: We thank the reviewer for the valuable suggestion to improve the quality  
 90 of the paper. The deep learning process has considered the impact of transmission  
 91 between different grids. The NN-CTM, which refers to U-Net branch in particular,  
 92 employs the convolution neural network to utilize neighbor information effectively. We  
 93 visualize a demo case of  $3 \times 3$  convolution and  $5 \times 5$  convolution in Fig. 2. In U-Net, the

94 stacked of convolution can get the neighbor information with a bigger receptive field  
95 (e.g. stacking  $5 \times 5$  convolution and  $5 \times 5$  convolution can get a  $9 \times 9$  convolution), the  
96 non-linear function (P-RELU) is employed to improve model fitting with nearly zero  
97 extra computational cost and little overfitting risk, and the batch normalization and  
98 dropout are employed to enhance the robustness of the model. We calculate that the  
99 receptive field of our model is  $38 \times 38$  grid. In other words, the predicted pollutant  
100 concentration is related to its surrounding  $38 \times 38$  grid's information, which represents  
101 the transmission between different grids. Meanwhile, the closer the distance, the greater  
102 the contribution.

103

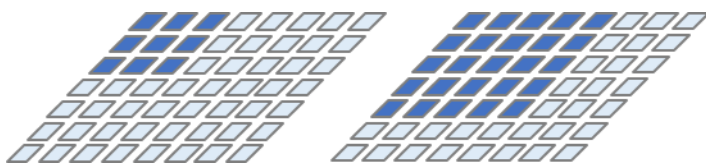

104

105 Figure 2: The visualization of convolution neural network (left:  $3 \times 3$  kernel size, right:  
106  $5 \times 5$  kernel size).

107

108 We have clarified the impact of transmission between different grids in the revised  
109 manuscript, as follows:

110 (Section 2.2, Paragraph 3) *“In U-Net, the stacked of convolution can get the neighbor  
111 information with a bigger receptive field (e.g. stacking  $5 \times 5$  convolution and  $5 \times 5$   
112 convolution can get a  $9 \times 9$  convolution), the non-linear function (P-RELU) is employed  
113 to improve model fitting with nearly zero extra computational cost and little overfitting  
114 risk, and the batch normalization and dropout are employed to enhance the robustness  
115 of the model. We calculate that the receptive field of our model is  $38 \times 38$  grid. In other  
116 words, the predicted pollutant concentration is related to its surrounding  $38 \times 38$  grid's  
117 information, which represents the transmission between different grids. Meanwhile, the  
118 closer the distance, the greater the contribution.”*

119

120 [Comment]: Lines 24-26, Abstract. Please be specific on the simulation year and the  
121 emission inventory you applied.

122 [Response]: We apologize for missing this information, and we have added year 2015  
123 in Abstract.

124

125 [Comment]: Line 310, Page 15. I suggest the authors add more description for Figure  
126 8, such as explaining why the performance of using the new emission inventory

127 worsened at some sites.

128 [Response]: We appreciate the reviewer for the valuable suggestion. We have added  
129 more explanations accordingly as follows:

130 (Section 3.4, Paragraph 2) *“The model performance of most stations has been improved,  
131 and a small number of stations with worsen performance show the link between  
132 compound pollutants. For example, stations with larger deviations between PM<sub>2.5</sub>  
133 simulation results and observations tend to have greatly improved O<sub>3</sub> performance, and  
134 vice versa.”*

135

136 [Comment]: The language of the manuscript needs to be further polished.

137 [Response]: We thank the reviewer for the comment, and we have further polished the  
138 manuscript and checked grammar carefully. All modifications will be marked in the  
139 revised manuscript.
